1 **Cohort profile: St. Michael's Hospital Tuberculosis Database (SMH-TB), a retrospective**  
2 **cohort of electronic health record data and variables extracted using natural language**  
3 **processing**

4 David Landsman<sup>1</sup>, Ahmed Abdelbasit<sup>2</sup>, Christine Wang<sup>2</sup>, Michael Guerzhoy<sup>3, 4, 5</sup>, Ujash Joshi<sup>4</sup>,  
5 Shaun Mathew<sup>6</sup>, Chloe Pou-Prom<sup>7</sup>, David Dai<sup>7</sup>, Victoria Pequegnat<sup>8</sup>, Joshua Murray<sup>7</sup>, Kamalprit  
6 Chokar<sup>9</sup>, Michaelia Banning<sup>7</sup>, Muhammad Mamdani<sup>5, 7, 10, 11, 12</sup>, Sharmistha Mishra<sup>¶, 1, 2, 11</sup>, Jane  
7 Batt<sup>\*,¶, 13, 14</sup>

- 8 1. MAP Centre for Urban Health Solutions, Li Ka Shing Knowledge Institute, St. Michael's  
9 Hospital, Unity Health Toronto, Toronto, Ontario, Canada  
10 2. Department of Medicine, University of Toronto, Toronto, Ontario, Canada  
11 3. Princeton University, Princeton, New Jersey, United States  
12 4. University of Toronto, Toronto, Ontario, Canada  
13 5. Li Ka Shing Knowledge Institute, St. Michael's Hospital, Unity Health Toronto, Toronto,  
14 Ontario, Canada  
15 6. Department of Computer Science, Ryerson University, Toronto, Ontario, Canada  
16 7. Unity Health Toronto, Toronto, Ontario, Canada  
17 8. Decision Support Services, St. Michael's Hospital, Unity Health Toronto, Toronto,  
18 Ontario, Canada  
19 9. Division of Respiriology, Department of Medicine, St. Michael's Hospital, Unity Health  
20 Toronto, Toronto, Ontario, Canada  
21 10. Leslie Dan Faculty of Pharmacy, University of Toronto, Canada, Toronto, Ontario,  
22 Canada  
23 11. Institute of Health Policy, Management, and Evaluation, University of Toronto, Toronto,  
24 Ontario, Canada  
25 12. Vector Institute, Toronto, Ontario, Canada  
26 13. Keenan Research Center for Biomedical Science, St. Michael's Hospital, Unity Health  
27 Toronto, Toronto, Ontario, Canada  
28 14. Institute of Medical Science, University of Toronto, Toronto, Ontario, Canada

29 <sup>¶</sup>These authors contributed equally to this work.

30 <sup>\*</sup>Corresponding author: Jane Batt, MD, PhD

31 E-mail: [Jane.batt@utoronto.ca](mailto:Jane.batt@utoronto.ca)

32

33

34

## 35 **Author Contributions**

36 David Landsman – Data Curation, Formal Analysis, Investigation, Methodology, Software,  
37 Validation, Visualization, Writing – Original Draft Preparation, Writing – Review & Editing

38 Ahmed Abdelbasit – Data Curation, Investigation, Validation, Writing – Original Draft  
39 Preparation, Writing – Review & Editing

40 Christine Wang – Data Curation, Investigation, Validation, Writing – Review & Editing

41 Michael Guerzhoy – Investigation, Methodology, Software, Writing – Review & Editing

42 Ujash Joshi – Investigation, Methodology, Software, Writing – Review & Editing

43 Shaun Mathew – Investigation, Methodology, Software, Writing – Review & Editing

44 Chloe Pou-Prom – Investigation, Methodology, Software, Writing – Review & Editing

45 David Dai – Investigation, Methodology, Software, Writing – Review & Editing

46 Victoria Pequegnat – Data Curation, Resources, Validation, Writing – Review & Editing

47 Joshua Murray – Investigation, Methodology, Software, Writing – Review & Editing

48 Kamalprit Chokar – Data Curation, Writing – Review & Editing

49 Michaelia Banning – Project Administration, Writing – Review & Editing

50 Muhammad Mamdani – Project Administration, Writing – Review & Editing

51 Sharmistha Mishra – Conceptualization, Data Curation, Funding Acquisition, Investigation,  
52 Methodology, Project Administration, Resources, Supervision, Validation, Writing – Review &  
53 Editing

54 Jane Batt – Conceptualization, Data Curation, Funding Acquisition, Investigation, Methodology,  
55 Project Administration, Resources, Supervision, Validation, Writing – Review & Editing

## 56 **Abstract**

### 57 ***Background***

58 Tuberculosis (TB) is a major cause of death worldwide. TB research draws heavily on clinical  
59 cohorts which can be generated using electronic health records (EHR), but granular information  
60 extracted from unstructured EHR data is limited. The St. Michael's Hospital TB database (SMH-  
61 TB) was established to address gaps in EHR-derived TB clinical cohorts and provide researchers  
62 and clinicians with detailed, granular data related to TB management and treatment.

### 63 ***Methods***

64 We collected and validated multiple layers of EHR data from the TB outpatient clinic at St.  
65 Michael's Hospital, Toronto, Ontario, Canada to generate the SMH-TB database. SMH-TB  
66 contains structured data directly from the EHR, and variables generated using natural language  
67 processing (NLP) by extracting relevant information from free-text within clinic, radiology, and  
68 other notes. NLP performance was assessed using recall, precision and  $F_1$  score averaged across  
69 variable labels. We present characteristics of the cohort population using binomial proportions  
70 and 95% confidence intervals (CI), with and without adjusting for NLP misclassification errors.

### 71 ***Results***

72 SMH-TB currently contains retrospective patient data spanning 2011 to 2018, for a total of 3298  
73 patients (N=3237 with at least 1 associated dictation). Performance of TB diagnosis and  
74 medication NLP rulesets surpasses 93% in recall, precision and  $F_1$  metrics, indicating good  
75 generalizability. We estimated 20% (95% CI: 18.4-21.2%) were diagnosed with active TB and  
76 46% (95% CI: 43.8-47.2%) were diagnosed with latent TB. After adjusting for potential  
77 misclassification, the proportion of patients diagnosed with active and latent TB was 18% (95%  
78 CI: 16.8-19.7%) and 40% (95% CI: 37.8-41.6%) respectively

### 79 ***Conclusion***

80 SMH-TB is a unique database that includes a breadth of structured data derived from structured  
81 and unstructured EHR data. The data are available for a variety of research applications, such as  
82 clinical epidemiology, quality improvement and mathematical modelling studies.

83

## 84 **Introduction**

85 Tuberculosis (TB) is the top infectious killer worldwide, resulting in 1.6 million deaths in 2017  
86 (1). 1.7 billion people carry the latent form of the infection, of whom 10% at minimum, will  
87 develop the active, infectious form of disease. Latent TB infection (LTBI) progression to active  
88 disease can be prevented and TB can be cured, with appropriate antibiotics taken over many  
89 months. TB is endemic in many low-income countries and particularly prevalent in Asia and  
90 Africa. The World Health Organization recommends the treatment of LTBI as part of the global  
91 “End TB Strategy”, and an achievable goal critical to TB elimination in high-income countries  
92 (2,3).

93 Given the burden of active TB disease is disproportionately carried in low-resource settings,  
94 research addressing disease epidemiology, treatment (including clinical trials and programs of  
95 delivery), and the use and utility of innovative and point of care diagnostics is often completed in  
96 the populations of countries with highest burden of TB. The prevalence of LTBI on the other  
97 hand, is considerable even in high-income countries (CDC estimates 13,000,000 people living  
98 the USA have LTBI (4)) and thus research ranging from basic pathogenesis to program  
99 development can be conducted on the global population. Indeed while advances in biomedical  
100 research over the past 1 to 2 decades have delivered successes ranging from rapid point-of-care  
101 diagnostics testing for pulmonary TB to the development of novel therapeutics such as  
102 bedaquiline and delamanid, many questions remain, including, for example, discovering  
103 biomarkers that precisely indicate individuals at risk of LTBI activation and developing  
104 programs of TB care that ensure efficacy, are equitable and resilient (1,5).

105 Many primary care practices and hospitals in high-income countries have curated electronic  
106 health record (EHR) data for research and surveillance (6–9), that improve ease of access to  
107 information and data sharing for collaborative work. The use of EHRs in hospital and office-  
108 based clinical practices has risen substantially in the past decade, providing rich data sources that  
109 have the potential to simultaneously improve patient care and advance research initiatives  
110 (10,11). Most EHR-derived databases are however limited to structured data, such as  
111 demographic information collected at patient registration, laboratory tests and results and  
112 diagnostic codes used in physician billing. As such, the rich, granular data embedded within  
113 unstructured (text) data from dictated notes on both hospital admitted and clinic patients are  
114 excluded (12,13) unless these variables are abstracted via manual chart review (14,15) or natural  
115 language processing (NLP) (16–18). We developed the first digital retrospective clinical  
116 database that combines structured data, unstructured (text) data, and variables derived from  
117 transforming unstructured data to structured data using natural language rulesets, among patients  
118 assessed in an inner-city outpatient TB clinic at St Michaels Hospital (SMH) of Unity Health  
119 Toronto in Toronto, Ontario, Canada.

120 Approximately 2000 people (5.6 per 100,000 people) are diagnosed with active TB in Canada  
121 (19) annually and 1.3 million are estimated to have LTBI. The SMH TB clinic cares exclusively  
122 for individuals with suspected or diagnosed active TB and LTBI, seeing 1800-2200 patient-visits  
123 each year, and assessing and developing a diagnostic and management plan for 670-800 new  
124 patients each year.

125 In this paper we describe the SMH-TB database, which aims to be a resource for scientists who  
126 are conducting research into many facets of TB, ranging from observational epidemiology to  
127 emulated trials and quality improvement and implementation science research. The purpose of  
128 this profile is to describe our methodology, present the cohort and the database validation.  
129 Access to the database is available to collaborators wishing to work with the research team of the  
130 SMH TB clinic. The NLP rulesets developed to extract variables from the unstructured data in  
131 the EHR are publicly available on GitHub (20).

## 132 **Materials and methods**

### 133 **Cohort Description**

134 The database compiles all data available on all TB clinic patients (N=3298) treated at SMH from  
135 April 2011 to December 2018. The database contains socio-demographic information  
136 surrounding immigration, housing status, and insurance, and clinical information including  
137 laboratory and imaging results, co-morbidities, diagnoses and treatment. Ethics approval for  
138 development and validation of the database was obtained from the Unity Health Toronto  
139 Research Ethics Board (REB 19-080). Patient consent was not required or obtained as per the  
140 Tri-Council Policy Statement 2 (TCPS2), since only retrospective data were collected from  
141 clinical charts (21).

142 Patients are referred to the TB outpatient clinic predominantly from Public Health Units in the  
143 Greater Toronto area (population of 6 million), Canada Immigration and Citizenship,  
144 Occupational Health and Safety Departments of Toronto area hospitals, community health care  
145 professionals (physicians, nurse-practitioners), and SMH staff physicians caring for an admitted  
146 patient or a patient in the emergency room (ER). When including a patient in our database we  
147 consider all available encounters, including inpatient admissions and ER visits.

### 148 **Data Collection**

149 St. Michael's Hospital EHR is managed by several systems. The Enterprise Data Warehouse  
150 (EDW) stores and manages structured data including patient demographics and medical test  
151 results. Soarian stores the unstructured patient data, which includes dictated clinical notes. SMH-  
152 TB retrieved data of patients registered and assessed in the TB outpatient clinic to provide a  
153 comprehensive description of patient characteristics, disease, management and clinical trajectory.

154 SMH-TB is restricted to a start-date of April 2011, which is the date of initiation of EHR at  
 155 SMH. Fig 1 shows the data flow and data sources for the SMH-TB database.

156 **Fig 1: Data sources for SMH-TB Database**

157 The SMH-TB database stores patient characteristics and encounter data in separate tables, which  
 158 can be linked together using unique, de-identified patient or encounter IDs. Fig 2 presents the  
 159 tables provided in SMH-TB, and the granularity of the data they contain. A detailed collection of  
 160 all the variables available in the database is provided in Table 1.

161 **Fig 2: Patient-level and Encounter-level Data in SMH-TB**

162 **Table 1: Variables available in SMH-TB from both structured and unstructured sources**

|                                 |                                 |
|---------------------------------|---------------------------------|
| Demographics                    | Tuberculosis Diagnosis          |
| Patient ID                      | Known TB exposure*              |
| MRN                             | BCG vaccination status*         |
| Sex                             | TST performed*                  |
| Date of birth                   | TST induration*                 |
| Street address                  | TST interpretation*             |
| Postal code <sup>a</sup>        | IGRA performed*                 |
| Country of origin*              | IGRA interpretation*            |
| Year of immigration*            | Diagnosis of active TB*         |
| Immigration status              | Diagnosis of LTBI*              |
| Housing status                  |                                 |
| Insurance status                | <b>Tuberculosis Medications</b> |
| Patient is a healthcare worker* | Ever started isoniazid*         |
|                                 | Ever started rifampin*          |
| Encounter Details               | Ever started pyrazinamide*      |
| Encounter ID                    | Ever started ethionamide*       |
| Encounter type                  | Ever started vitamin B6*        |

|                                                                     |                                             |
|---------------------------------------------------------------------|---------------------------------------------|
| Encounter date                                                      |                                             |
| Direct cost <sup>b</sup>                                            | <b>Medical Conditions and Comorbidities</b> |
| Indirect cost <sup>c</sup>                                          | Autoimmune conditions <sup>d*</sup>         |
|                                                                     | Diabetes*                                   |
| <b>Aggregate Variables</b>                                          | Hematological malignancy*                   |
| Number of sputum inductions                                         | Non-hematological malignancy*               |
| Number of chest x-rays                                              | Transplant performed*                       |
| Number of chest computed tomography                                 | Renal failure <sup>e*</sup>                 |
| Hospital admission during course of TB outpatient care              | Silicosis*                                  |
| Number of emergency room visits during course of TB outpatient care | Hepatitis B                                 |
|                                                                     | Hepatitis C                                 |
| <b>Laboratory Results</b>                                           | HIV status*                                 |
| AST                                                                 |                                             |
| ALT                                                                 | <b>Microbiology Reports**</b>               |
| CBC (Hb, Platelets, WBC)                                            | <b>Radiology Reports**</b>                  |
| Cr                                                                  | <b>Pathology Reports**</b>                  |
| Bilirubin                                                           |                                             |

163 MRN: Medical record number; AST: Aspartate transaminase; ALT: Alanine transaminase; CBC:  
 164 Complete blood count; Hb: Hemoglobin; WBC: White blood cells; Cr: Creatinine; TB: Tuberculosis;  
 165 BCG: Bacillus Calmette–Guérin; TST: Tuberculin sensitivity test; IGRA: Interferon gamma release  
 166 assay; LTBI: Latent tuberculosis infection; HIV: Human immunodeficiency viruses  
 167 <sup>a</sup>The database only stores the Forward Sortation Area portion of the postal code of the patient’s residence.  
 168 <sup>b</sup>Direct cost corresponds to health care services directly associated with the patient’s care including all  
 169 nursing, allied health, diagnostic and therapeutic services, pharmaceutical and medical/surgical supplies  
 170 for each visit.  
 171 <sup>c</sup>Indirect cost corresponds to administrative and support services performed on behalf of all patients  
 172 including information system and housekeeping overheads.



173 <sup>d</sup>Autoimmune conditions include: Sjogren’s syndrome, arthropathy, spondyloarthropathy, psoriatic  
174 arthritis, rheumatoid arthritis, reactive arthritis, mixed connective tissue disease, connective tissue disease,  
175 systemic lupus erythematosus, CREST syndrome, dermatomyositis, Wegener’s granulomatosis,  
176 Goodpasture syndrome, vasculitis and psoriasis.

177 <sup>e</sup>Renal failure includes: nephropathy, renal insufficiency and glomerulonephritis.

178 \*Variables collected from unstructured dictations and reports using natural language rulesets

179 \*\*Unstructured text from which variables will be generated using natural language rulesets

## 180 ***Removing identifiable information***

181 There are two versions of SMH-TB. The full version includes indelible patient identifiers such as  
182 a patient’s provincial health insurance (Ontario Health Insurance Plan) number; their SMH-  
183 specific medical record number; all patient encounters whose encounter record is specific to a  
184 given patient; laboratory test records whose encounter record is also specific to a given patient;  
185 and all unstructured text data per encounter per patient. The patient identifiers allow for a fully  
186 linked database, which can be updated and linked via future data extraction. The identifiable  
187 unstructured data are also retained to support the development and testing of additional natural  
188 language rulesets.

189 The de-identified version of SMH-TB is the version that will be primarily used for research  
190 studies. It excludes the unstructured data and has been stripped of the following: hospital patient  
191 ID, hospital encounter ID, address and day and month of date of birth. Each patient and  
192 encounter is then re-coded with new unique IDs, and with the age in years on the date of the first  
193 TB clinic encounter

## 194 ***Patient identification and validation***

195 The Decision Support Services (DSS) at SMH identified encounters which were coded as  
196 services provided in the TB outpatient clinic to identify all TB patients. We then randomly  
197 selected a list of 200 patients seen in the TB outpatient clinic (using clinic schedules with unique  
198 patient identifiers stored separately from the EDW) to manually validate the codes used by DSS  
199 to identify TB clinic outpatients, and validated that all (100%) identified patients were registered  
200 in the TB clinic. To ensure high specificity of our identification of TB clinic patients, we  
201 examined additional metadata (such as a mention of the TB clinic in the patient’s dictations) and  
202 removed patients without matching metadata. SMH-TB therefore may include the rare patient  
203 where the clinic visit codes in the EDW erroneously labelled a visit as a TB clinic visit, but this  
204 estimate is expected to be <0.2% because of the additional metadata checks. The hospital unique  
205 patient identifier for each individual was then cross referenced to lists of all individuals with  
206 inpatient stays and ER visits to derive TB patient data from all sites of contact for TB care.

## 207 ***Data transformation (unstructured text to structured variables)***

208 Unstructured clinician dictations were used to create patient-level variables on demographics, TB  
209 diagnosis, TB medications and comorbidities. The data for these variables were extracted using



210 rule-based information extraction tool CHARTextract (22). CHARTextract uses regular  
211 expressions in order to perform pattern matching on text. Regular expressions have been used to  
212 perform data extraction and even classification due to their high expressivity (17,23,24). These  
213 capabilities come at the cost of a complex syntax, and thus rule creation typically involves the  
214 expertise of a clinician who understands the subject matter and an interpreter who can express  
215 the idea into regular expression syntax. We created a tiered rule system, where primary rules are  
216 used to filter text at the sentence level using a scoring system and secondary rules can be used to  
217 further enhance the weighting of the sentence. The tool applies the user-created rules to the data  
218 and extracts the variables on-the-fly. The interface displays mismatches between the tool  
219 prediction and the gold-standard label. Users can iterate on the rule creation process, allowing for  
220 easy refinement and quick development of the rules. Fig 3 shows a component of a ruleset for  
221 extracting diagnosis of active tuberculosis.

222 **Fig 3: Example of a component of a ruleset for extracting a variable (active TB diagnosis)**  
223 **from unstructured text in clinical dictations (using CHARTextract)**

224 In order to create the rulesets used by CHARTextract, two clinicians (JB, SM) from the TB  
225 outpatient clinic were consulted on dictation language and style. Clinicians (JB, SM, AA, and  
226 KC) and a medical student (CW) manually labeled dictations for 200 patients from a subset of  
227 the dataset to be used for validation. The set of 200 patients was selected from consecutive clinic  
228 visits based on registered patient lists external to the EHR. This was done using the QuickLabel  
229 tool which provides a user interface for streamlined labelling of specific variables, as well as the  
230 option to label multiple variables simultaneously (25). Refinement of the natural language  
231 rulesets was done by comparing the labels extracted by the rulesets via CHARTextract with the  
232 manual labels. The refined rulesets are available as a real-time source as additional variables  
233 from unstructured data (microbiology, radiology, and pathology reports) are generated (20).

234 ***Evaluation of data extraction***

235 To measure the performance of our rulesets and evaluate their generalizability to unseen data, we  
236 calculated accuracy, recall, precision and  $F_1$  scores. Recall (sensitivity) measures the ability of  
237 the classifier to correctly distinguish true positive from false negative examples. Precision  
238 (positive predictive value) measures the ability of the classifier to correctly distinguish true  
239 positive from false positive examples. The  $F_1$  score computes a harmonic mean of precision and  
240 recall. Recall, precision and  $F_1$  score were averaged across variable labels.

241 ***Binomial proportions estimated from extracted variables***

242 We used the refined rulesets to extract variables from the full dataset of patients with at least 1  
243 dictation (N=3237). We converted “Yes/No/Not recorded” and “Positive/Negative/Unknown/Not  
244 recorded” variables into binary 0-1 variables by assigning a value of 1 to patients with an  
245 extracted value of “Yes” or “Positive”, and a value of 0 otherwise. We estimated the proportion  
246 and 95% confidence intervals of patients for which the rulesets extracted “Yes” or “Positive” for

247 these variables using two methods: (1) logistic regression model without covariates, and (2) MC-  
248 SIMEX model that accounts for the misclassification error in the extracted variables that was  
249 calculated from the set of 200 manually abstracted patients (26). Briefly, for a binary random  
250 variable  $Y$ , we estimate the probability  $P(Y = 1)$  using a logistic regression model without  
251 covariates, given by:

$$P(Y = 1) = h(\beta_0)$$

252 where  $h$  is the logistic function. Under the MC-SIMEX model, the binary random variable was  
253 observed with misclassification errors, denoted by  $Y^*$ . We estimate the probability  $P(Y^* = 1)$  as:

$$P(Y^* = 1) = h(\beta_0^*)$$

254 where  $\beta_0^*$  is defined as:

$$\beta_0^*(\lambda) = h^{-1}[\pi_{11}^\lambda h(\beta_0) + (1 - \pi_{00}^\lambda)(1 - h(\beta_0))]$$

255  $\pi_{00}$  and  $\pi_{11}$  denote the specificity and sensitivity of  $Y^*$ , respectively, and  $\lambda$  is the  
256 misclassification parameter. The final estimate for  $\beta_0^*$  is computed by a simulation-extrapolation  
257 procedure described in (26).

## 258 Results

### 259 Population

260 A patient overview based on demographics is presented in Table 2. 3298 patients were included  
261 in the database. The median age of the patients is 45 years, with an interquartile range of 34 to  
262 58. There is a higher percentage of females than males in the cohort, around 57%. At least 79%  
263 of the clinic patients were born outside of Canada, based on data extracted from patients'  
264 dictations. The vast majority of patients were adequately housed, with publicly funded provincial  
265 health care insurance (OHIP).

266 **Table 2: Demographics of the patients included in the SMH-TB database, 2011-2018.**

| Variable                                       | Value | Number of patients who attended at least 1 clinic visit (Total N=3298) |            |
|------------------------------------------------|-------|------------------------------------------------------------------------|------------|
|                                                |       | Count                                                                  | Percentage |
| Age-group in years<br>(median: 45, IQR: 34-58) | 10-20 | 7                                                                      | 0.212      |
|                                                | 20-30 | 422                                                                    | 12.8       |
|                                                | 30-40 | 802                                                                    | 24.3       |

|                                       |                                         |      |        |
|---------------------------------------|-----------------------------------------|------|--------|
|                                       | 40-50                                   | 705  | 21.4   |
|                                       | 50-60                                   | 575  | 17.4   |
|                                       | 60-70                                   | 388  | 11.8   |
|                                       | 70-80                                   | 245  | 7.42   |
|                                       | 80-90                                   | 126  | 3.82   |
|                                       | 90-100                                  | 30   | 0.910  |
|                                       | 100-110                                 | 2    | 0.0606 |
| Sex                                   | Female                                  | 1884 | 57.1   |
|                                       | Male                                    | 1417 | 42.9   |
|                                       | Missing <sup>a</sup>                    | 1    | 0.0303 |
| Born in Canada                        | Born in Canada                          | 247  | 7.48   |
|                                       | Born outside Canada                     | 2619 | 79.3   |
|                                       | Missing <sup>b</sup>                    | 436  | 13.2   |
| Underhoused <sup>c</sup>              | Yes                                     | 80   | 2.42   |
|                                       | No                                      | 3222 | 97.6   |
| Type of health insurance <sup>d</sup> | Ontario Health Insurance Plan (OHIP)    | 2859 | 86.6   |
|                                       | Uninsured Person Program (TB-UP)        | 221  | 6.69   |
|                                       | Refugee Health Coverage                 | 78   | 2.36   |
|                                       | University Health Insurance Plan (UHIP) | 41   | 1.24   |
|                                       | Self-payd                               | 76   | 2.30   |
|                                       | Other <sup>e</sup>                      | 27   | 0.819  |

267 IQR: Interquartile range

268 <sup>a</sup>May be due to error in data entry at time of patient registration.

269 <sup>b</sup>Patient dictations did not mention immigration status or country of birth, or no dictations were found.

270 <sup>c</sup>Underhoused: includes patients living in homeless shelters, group homes or patients with no fixed  
 271 address.  
 272 <sup>d</sup>For patients with more than one type of insurance, only the insurance type used for the latest encounter is  
 273 displayed in this table.  
 274 <sup>e</sup>Includes any patients with an out-of-province insurance, or not recorded insurance type.  
 275

276 ***Evaluation of data extraction***

277 A summary of the rulesets' performance metrics for the 25 variables extracted from unstructured  
 278 dictations is presented in Table 3. Diagnosis of active TB and LTBI rulesets had 97.5% and 96%  
 279 accuracy, and 97.4% and 94.7% F<sub>1</sub> score, respectively. Rulesets for extracting TB medications  
 280 generally achieved above 90% accuracy, recall and precision metrics.

281 **Table 3: Summary of performance metrics on test set for variables extracted from**  
 282 **unstructured dictations. Patients included in test set: N = 200.**

| Variable                       | True Positive* | True Negative* | Accuracy | Recall | Precision | F <sub>1</sub> Score |
|--------------------------------|----------------|----------------|----------|--------|-----------|----------------------|
| <b>Demographics</b>            |                |                |          |        |           |                      |
| Country of origin              | --             | --             | 0.970    | 0.987  | 0.987     | 0.986                |
| Year of immigration            | --             | --             | 0.805    | 0.834  | 0.891     | 0.850                |
| Patient is a healthcare worker | 29             | 171            | 0.940    | 0.850  | 0.897     | 0.871                |
| <b>Tuberculosis Diagnosis</b>  |                |                |          |        |           |                      |
| Known TB exposure              | 43             | 157            | 0.965    | 0.952  | 0.945     | 0.949                |
| BCG vaccination status         | 89             | 111            | 0.865    | 0.852  | 0.887     | 0.859                |
| TST performed                  | 100            | 100            | 0.990    | 0.990  | 0.990     | 0.990                |
| TST induration                 | --             | --             | 0.985    | 0.954  | 0.960     | 0.957                |
| TST interpretation             | 86             | 114            | 0.980    | 0.978  | 0.981     | 0.980                |
| IGRA performed                 | 14             | 186            | 1.00     | 1.00   | 1.00      | 1.00                 |

|                                               |     |     |       |       |       |       |
|-----------------------------------------------|-----|-----|-------|-------|-------|-------|
| IGRA interpretation                           | 5   | 195 | 1.00  | 1.00  | 1.00  | 1.00  |
| Diagnosis of active TB                        | 120 | 80  | 0.975 | 0.975 | 0.973 | 0.974 |
| Diagnosis of LTBI                             | 49  | 151 | 0.960 | 0.953 | 0.941 | 0.947 |
| <b>Tuberculosis Medications</b>               |     |     |       |       |       |       |
| Ever started isoniazid                        | 150 | 50  | 0.960 | 0.933 | 0.959 | 0.945 |
| Ever started rifampin                         | 127 | 73  | 0.970 | 0.962 | 0.974 | 0.967 |
| Ever started pyrazinamide                     | 124 | 76  | 0.995 | 0.996 | 0.994 | 0.995 |
| Ever started ethambutol                       | 118 | 82  | 0.985 | 0.985 | 0.984 | 0.984 |
| Ever started vitamin B6                       | 147 | 53  | 0.990 | 0.987 | 0.987 | 0.987 |
| <b>Medical Conditions and Comorbidities**</b> |     |     |       |       |       |       |
| Autoimmune conditions                         | 8   | 192 | 0.965 | 0.862 | 0.767 | 0.807 |
| Diabetes                                      | 26  | 174 | 0.945 | 0.870 | 0.883 | 0.876 |
| Hematological malignancy                      | 2   | 198 | 0.990 | 0.748 | 0.748 | 0.748 |
| Non-hematological malignancy                  | 12  | 188 | 0.955 | 0.937 | 0.787 | 0.843 |
| Renal failure                                 | 8   | 192 | 0.975 | 0.807 | 0.849 | 0.827 |
| HIV status                                    | 2   | 198 | 0.995 | 0.998 | 0.833 | 0.899 |

283 TB: Tuberculosis; BCG: Bacillus Calmette–Guérin; TST: Tuberculin sensitivity test; IGRA: Interferon  
 284 gamma release assay; LTBI: Latent tuberculosis infection; HIV: Human immunodeficiency viruses

285 \*True positives are defined as observations with a value of “Yes” or “Positive”; True negatives are  
 286 defined as the complement of true positives; only applicable for extracted variables which have  
 287 “Yes/No/Not recorded” or “Positive/Negative” values.  
 288 \*\*Patients that had undergone a transplant and patients diagnosed with silicosis were excluded from this  
 289 table due to having no positive example in the test set.

290 ***Binomial proportions estimated from extracted variables***

291 The estimated proportions and their 95% confidence intervals created from the “Yes/No/Not  
 292 recorded” and “Positive/Negative” extracted variables are given in Table 4.

293 **Table 4: Binomial proportion estimate and 95% confidence interval (CI) using standard**  
 294 **binary regression and MC-SIMEX model for binary variables created from extracted**  
 295 **variables. Total patients with at least 1 dictation: N = 3237.**

| Description                             | Count (N=3237) | Logistic regression estimate (95% CI) | MC-SIMEX model estimate (95% CI) |
|-----------------------------------------|----------------|---------------------------------------|----------------------------------|
| <b>Demographics</b>                     |                |                                       |                                  |
| Healthcare workers                      | 438            | 13.5% (12.4, 14.8)                    | 2.48% (2.02, 3.04)               |
| <b>Tuberculosis Diagnosis</b>           |                |                                       |                                  |
| Known TB exposure                       | 706            | 21.8% (20.4, 23.3)                    | 16.8% (15.3, 18.3)               |
| Received BCG vaccination                | 1316           | 40.7% (39.0, 42.4)                    | 24.8% (23.0, 26.7)               |
| Performed a TST                         | 2279           | 70.4% (68.8, 72.0)                    | 69.7% (68.1, 71.3)               |
| Received a positive TST interpretation  | 2031           | 62.7% (61.1, 64.4)                    | 61.9% (60.2, 63.6)               |
| Performed an IGRA                       | 296            | 9.14% (8.20, 10.2)                    | 9.14% (8.20, 10.2)               |
| Received a positive IGRA interpretation | 301            | 9.30% (8.35, 10.3)                    | 9.30% (8.35, 10.3)               |
| Diagnosed with active TB                | 640            | 19.8% (18.4, 21.2)                    | 18.2% (16.8, 19.7)               |
| Diagnosed with LTBI                     | 1473           | 45.5% (43.8, 47.2)                    | 39.7% (37.8, 41.6)               |

| <b>Tuberculosis Medications</b>                |      |                       |                               |
|------------------------------------------------|------|-----------------------|-------------------------------|
| Ever started on isoniazid                      | 1314 | 40.6%<br>(38.9, 42.3) | 45.6%<br>(43.6, 47.5)         |
| Ever started on rifampin                       | 548  | 16.9%<br>(15.7, 18.3) | 17.6%<br>(16.3, 19.1)         |
| Ever started on pyrazinamide                   | 349  | 10.8%<br>(9.76, 11.9) | 9.99%<br>(8.96, 11.1)         |
| Ever started on ethambutol                     | 348  | 10.8%<br>(9.73, 11.9) | 9.36%<br>(8.32, 10.5)         |
| Ever started on vitamin B6                     | 986  | 30.5%<br>(28.9, 32.1) | 30.6%<br>(29.0, 32.2)         |
| <b>Medical Conditions and Comorbidities*</b>   |      |                       |                               |
| Autoimmune conditions                          | 167  | 5.16%<br>(4.45, 5.98) | 0.259%<br>(0.175, 0.383)      |
| Diabetes                                       | 179  | 5.53%<br>(4.79, 6.37) | 0.358%<br>(0.247, 0.517)      |
| Hematological malignancy                       | 71   | 2.19%<br>(1.74, 2.76) | 0.00625%<br>(0.00320, 0.0122) |
| Non-hematological malignancy                   | 140  | 4.32%<br>(3.68, 5.08) | 0.860%<br>(0.599, 1.23)       |
| Renal failure                                  | 65   | 2.01%<br>(1.58, 2.55) | 0.00895%<br>(0.00450, 0.0180) |
| Diagnosed with HIV                             | 175  | 5.41%<br>(4.68, 6.24) | 5.43%<br>(4.69, 6.26)         |
| No relevant medical conditions/comorbidities** | 2569 | 79.4%<br>(77.9, 80.7) | 89.3%<br>(87.9, 90.6)         |

296 MC-SIMEX: Misclassification Simulation Extraction; CI: Confidence interval; TB: Tuberculosis; BCG:  
 297 Bacillus Calmette–Guérin; TST: Tuberculin sensitivity test; IGRA: Interferon gamma release assay;  
 298 LTBI: Latent tuberculosis infection; HIV: Human immunodeficiency viruses  
 299 \*Patients that had undergone a transplant and patients diagnosed with silicosis were excluded from this  
 300 table due to having no positive example in the test set.



301 \*\*Includes any patient with an extracted value of “No/Not recorded/Negative” for all medical  
302 conditions/comorbidities listed in the table.

303 After accounting for misclassification errors, the proportion of patients with an active TB  
304 diagnosis was 18.2% and the proportion of patients with an LTBI diagnosis was 39.7%. 69.7%  
305 of patients had performed a tuberculin sensitivity test and 61.9% of all patients had a positive  
306 result for the test. The proportions of patients who were ever started on isoniazid, rifampin or B6  
307 were 45.6%, 17.6% and 30.6% percent, respectively.

## 308 Discussion

309 To facilitate research on TB clinical epidemiology, diagnostics, clinical care and program  
310 implementation, quality improvement, and linkage for future therapeutics trials and biomarker  
311 studies, we developed a retrospective database of TB clinic patients using structured and  
312 unstructured EHR data. The cohort and database are unique in the transformation of unstructured  
313 data into structured variables using natural language rulesets with excellent performance when  
314 validated against manual chart abstraction. The rulesets are open access, and the database is  
315 accessible for research and open for collaboration with approval from local research ethics board.

316 The strength of the SMH-TB database comes from the inclusion of granular data, achieved by  
317 extracting it from unstructured sources using natural language processing. While the database  
318 contains standard structured data accessible in a wide variety of EHRs, a large and unique  
319 component of our data comes directly from unstructured dictated clinic notes, which contain a  
320 vast number of variables that can be used for a broad range of research topics, including, for  
321 example, clinical epidemiology and modelling studies. The NLP rulesets allow us to create  
322 granular patient-level variables from unstructured data accurately and efficiently, reducing the  
323 amount of time spent on manual abstraction to a minimum. Moreover, the large amount of  
324 unstructured raw data is a tremendous resource for evaluating and deploying machine learning  
325 and deep learning models capable of automatically extracting meaningful variables from clinical  
326 notes (27–29). Machine learning models and workflows can be developed to leverage the  
327 structured and extracted variables for predictive modeling and early warning systems (30–32).  
328 The breadth of data provided makes this a unique and powerful tool in both clinical and  
329 computational research.

330 The main limitations of the SMH-TB database include issues that arise from missing or incorrect  
331 data and the limited availability of data for certain variables leading to non-robust natural  
332 language rulesets. Data errors can be due to both human and algorithmic mistakes. Much of the  
333 burden of including relevant data in clinical dictations lies with the clinician attending the patient  
334 and dictating the note. In the absence of a standardized format, as was the case in the SMH TB  
335 clinic, variables may not be dictated in a manner that enables their capture by the NLP tools, or  
336 are not dictated at all. The creation of a shared set of guidelines and standard formatting for TB

337 clinic dictations, containing all variables relevant to the database, will ensure all data required are  
338 captured with future database updates.

339 When the unstructured data undergoes information extraction, mislabeling of variables can occur  
340 due to certain rulesets having subpar performance. This issue is especially apparent for variables  
341 with scarce availability of labels. For example, in our validation dataset there were no patients  
342 with silicosis. The ruleset for classifying silicosis was adapted from other immunosuppressive  
343 conditions and expert knowledge in disease. While it is possible that such rulesets are overly  
344 confident in assigning a “No” label to patients even if they present with the condition in  
345 question, given the rarity of the event in the patient population it was not possible to provide  
346 further cases for perfection of refinement of the NLP ruleset. As such, we have indicated the  
347 metrics of our variables (Table 3), so that researchers can understand the limitations of the data  
348 with which they are working. The 200 charts sampled for ruleset refinement were consecutive  
349 patients from a set of clinic visits and may not have been sufficient for less common variables  
350 such as comorbidities. That is, further ruleset refinement will be needed with additional charts  
351 with purposive sampling of true positives of infrequent variables.

## 352 **Conclusion**

353 In summary, here we describe the SMH-TB cohort and database which aim to be a resource for  
354 scientists who are conducting research into many facets of TB. The database is unique in that it  
355 contains highly granular socio-demographic and clinical patient data derived from structured and  
356 unstructured EHR data extracted using NLP rule sets. The validated rule sets are provided open  
357 access for use and the data base is intended to be available for collaborative studies.

## 358 **Data Availability**

359 The validated NLP rulesets are publicly available for use from: [https://github.com/mishra-lab/tb-](https://github.com/mishra-lab/tb-nlp-rulesets)  
360 [nlp-rulesets](https://github.com/mishra-lab/tb-nlp-rulesets). Data collected in SMH-TB contains sensitive patient information and as such,  
361 researchers interested in conducting TB-related research using the data are welcome to contact  
362 the corresponding author and submit a request. The study team welcomes collaboration and use  
363 of the database, and all external requests will be screened to ensure adequate data exists to enable  
364 a collaboration. The project will then undergo the approval process of the Research and Ethics  
365 Board (REB) of Unity Health Toronto. Data provided to researchers can either be the de-  
366 identified version of the SMH-TB database, or the full identifiable version, based on their  
367 research needs and REB approval.

## 368 **Funding**

369 Supported by the Ontario Early Researcher Award Number ER17-13-043 (to SM). The funders  
370 had no role in study design, data collection and analysis, decision to publish, or preparation of  
371 the manuscript.

## 372 **Acknowledgements**

373 We thank Dr. Natasha Sabur for supporting arbitration for rulesets; Julie Seemangal (TB  
374 Outpatient Clinic Co-Lead) and Grace Bezaliel for supporting verification of algorithms to  
375 classify patients seen in the TB clinic.

376

## 377 **References**

- 378 1. Reid MJA, Arinaminpathy N, Bloom A, Bloom BR, Boehme C, Chaisson R, et al. Building a  
379 tuberculosis-free world: The Lancet Commission on tuberculosis. *Lancet Lond Engl*. 2019  
380 Mar 30;393(10178):1331–84.
- 381 2. Uplekar M, Weil D, Lönnroth K, Jaramillo E, Lienhardt C, Dias HM, et al. WHO’s new End  
382 TB Strategy. *The Lancet*. 2015 May 2;385(9979):1799–801.
- 383 3. Lönnroth K, Migliori GB, Abubakar I, D’Ambrosio L, Vries G de, Diel R, et al. Towards  
384 tuberculosis elimination: an action framework for low-incidence countries. *Eur Respir J*.  
385 2015 Apr 1;45(4):928–52.
- 386 4. CDC. Deciding When to Treat Latent TB Infection [Internet]. 2018 [cited 2020 Aug 25].  
387 Available from: <https://www.cdc.gov/tb/topic/treatment/decideltbi.htm>
- 388 5. Kim PS, Makhene M, Sizemore C, Hafner R. Viewpoint: Challenges and Opportunities in  
389 Tuberculosis Research. *J Infect Dis*. 2012 May 15;205(suppl\_2):S347–52.
- 390 6. Busingye D, Gianacas C, Pollack A, Chidwick K, Merrifield A, Norman S, et al. Data  
391 Resource Profile: MedicineInsight, an Australian national primary health care database. *Int J*  
392 *Epidemiol*. 2019 Dec 1;48(6):1741–1741h.
- 393 7. Garies S, Birtwhistle R, Drummond N, Queenan J, Williamson T. Data Resource Profile:  
394 National electronic medical record data from the Canadian Primary Care Sentinel  
395 Surveillance Network (CPCSSN). *Int J Epidemiol*. 2017 Aug 1;46(4):1091–1092f.
- 396 8. Finer S, Martin HC, Khan A, Hunt KA, MacLaughlin B, Ahmed Z, et al. Cohort profile: East  
397 London genes & health (ELGH), a community-based population genomics and health study  
398 of British Bangladeshi and British Pakistani people. *Int J Epidemiol* [Internet]. [cited 2020  
399 Mar 2]; Available from: [https://academic.oup.com/ije/advance-](https://academic.oup.com/ije/advance-article/doi/10.1093/ije/dyz174/5555939)  
400 [article/doi/10.1093/ije/dyz174/5555939](https://academic.oup.com/ije/advance-article/doi/10.1093/ije/dyz174/5555939)
- 401 9. Ashfaq A, Lönn S, Nilsson H, Eriksson JA, Kwatra J, Yasin ZM, et al. Data resource profile:  
402 Regional healthcare information platform in Halland, Sweden, a dedicated environment for  
403 healthcare research. *Int J Epidemiol* [Internet]. [cited 2020 Mar 2]; Available from:  
404 <https://academic.oup.com/ije/advance-article/doi/10.1093/ije/dyz262/5701527>
- 405 10. Office of the National Coordinator for Health Information Technology. Office-based  
406 Physician Electronic Health Record Adoption [Internet]. 2019 [cited 2020 Apr 7]. Available  
407 from: [dashboard.healthit.gov/quickstats/pages/physician-ehr-adoption-trends.php](https://dashboard.healthit.gov/quickstats/pages/physician-ehr-adoption-trends.php)
- 408 11. Henry J, Pylypchuk Y, Searcy T, Patel V. Adoption of electronic health record systems  
409 among US non-federal acute care hospitals: 2008–2015. *ONC Data Brief*. 2016;35:1–9.

- 410 12. Chan KS, Fowles JB, Weiner JP. Review: Electronic Health Records and the Reliability and  
411 Validity of Quality Measures: A Review of the Literature. *Med Care Res Rev*. 2010 Oct  
412 1;67(5):503–27.
- 413 13. Nicholson A, Tate AR, Koeling R, Cassell JA. What does validation of cases in electronic  
414 record databases mean? The potential contribution of free text. *Pharmacoepidemiol Drug*  
415 *Saf*. 2011;20(3):321–4.
- 416 14. Khan K, Campbell A, Wallington T, Gardam M. The impact of physician training and  
417 experience on the survival of patients with active tuberculosis. *CMAJ Can Med Assoc J*.  
418 2006 Sep 26;175(7):749–53.
- 419 15. Long R, Heffernan C, Gao Z, Egedahl ML, Talbot J. Do “Virtual” and “Outpatient” Public  
420 Health Tuberculosis Clinics Perform Equally Well? A Program-Wide Evaluation in Alberta,  
421 Canada. *PLoS ONE* [Internet]. 2015 Dec 23 [cited 2020 Apr 7];10(12). Available from:  
422 <https://www.ncbi.nlm.nih.gov/pmc/articles/PMC4689372/>
- 423 16. Baldwin KB. Evaluating Healthcare Quality Using Natural Language Processing. *J Healthc*  
424 *Qual*. 2008;30(4):24–9.
- 425 17. Luo Y, Thompson WK, Herr TM, Zeng Z, Berendsen MA, Jonnalagadda SR, et al. Natural  
426 Language Processing for EHR-Based Pharmacovigilance: A Structured Review. *Drug Saf*.  
427 2017;40(11):1075–89.
- 428 18. Wang Y, Wang L, Rastegar-Mojarad M, Moon S, Shen F, Afzal N, et al. Clinical  
429 information extraction applications: A literature review. *J Biomed Inform*. 2018 Jan 1;77:34–  
430 49.
- 431 19. WHO. Tuberculosis country profiles [Internet]. World Health Organization; [cited 2020 Apr  
432 7]. Available from: <http://www.who.int/tb/country/data/profiles/en/>
- 433 20. Landsman D, LKS-CHART. Tuberculosis NLP Rulesets [Internet]. GitHub. [cited 2020 Jul  
434 1]. Available from: <https://github.com/mishra-lab/tb-nlp-rulesets>
- 435 21. Government of Canada. Tri-Council Policy Statement: Ethical Conduct for Research  
436 Involving Humans – TCPS 2 (2018) [Internet]. 2019 [cited 2020 Aug 27]. Available from:  
437 [https://ethics.gc.ca/eng/policy-politique\\_tcps2-eptc2\\_2018.html](https://ethics.gc.ca/eng/policy-politique_tcps2-eptc2_2018.html)
- 438 22. LKS-CHART. CHARTextract [Internet]. CHARTextract. [cited 2020 Jun 29]. Available  
439 from: <https://lks-chart.github.io/CHARTextract-docs/>
- 440 23. Rosier A, Burgun A, Mabo P. Using regular expressions to extract information on pacemaker  
441 implantation procedures from clinical reports. *AMIA Annu Symp Proc*. 2008;2008:81–5.
- 442 24. Finley G, Edwards E, Robinson A, Brenndorfer M, Sadoughi N, Fone J, et al. An automated  
443 medical scribe for documenting clinical encounters. In: *Proceedings of the 2018 Conference*  
444 *of the North American Chapter of the Association for Computational Linguistics:*  
445 *Demonstrations* [Internet]. New Orleans, Louisiana: Association for Computational

- 446 Linguistics; 2018 [cited 2020 Jun 29]. p. 11–15. Available from:  
447 <https://www.aclweb.org/anthology/N18-5003>
- 448 25. Joshi U. QuickLabel [Internet]. 2019 [cited 2020 Jun 29]. Available from:  
449 <https://github.com/Sabrewarrior/QuickLabel>
- 450 26. Küchenhoff H, Mwalili SM, Lesaffre E. A General Method for Dealing with  
451 Misclassification in Regression: The Misclassification SIMEX. *Biometrics*. 2006;62(1):85–  
452 96.
- 453 27. Jagannatha AN, Yu H. Structured prediction models for RNN based sequence labeling in  
454 clinical text. *Proc Conf Empir Methods Nat Lang Process Conf Empir Methods Nat Lang*  
455 *Process*. 2016 Nov;2016:856–65.
- 456 28. Wu Y, Jiang M, Lei J, Xu H. Named Entity Recognition in Chinese Clinical Text Using  
457 Deep Neural Network. *Stud Health Technol Inform*. 2015;216:624–8.
- 458 29. Fries J. Brundefly at SemEval-2016 Task 12: Recurrent Neural Networks vs. Joint Inference  
459 for Clinical Temporal Information Extraction. In: *Proceedings of the 10th International*  
460 *Workshop on Semantic Evaluation (SemEval-2016)* [Internet]. San Diego, California:  
461 Association for Computational Linguistics; 2016 [cited 2020 Aug 25]. p. 1274–1279.  
462 Available from: <https://www.aclweb.org/anthology/S16-1198>
- 463 30. Miotto R, Li L, Kidd BA, Dudley JT. Deep Patient: An Unsupervised Representation to  
464 Predict the Future of Patients from the Electronic Health Records. *Sci Rep*. 2016 May  
465 17;6(1):26094.
- 466 31. Tran T, Nguyen TD, Phung D, Venkatesh S. Learning vector representation of medical  
467 objects via EMR-driven nonnegative restricted Boltzmann machines (eNRBM). *J Biomed*  
468 *Inform*. 2015 Apr 1;54:96–105.
- 469 32. Choi E, Bahadori MT, Schuetz A, Stewart WF, Sun J. Doctor AI: Predicting Clinical Events  
470 via Recurrent Neural Networks. *JMLR Workshop Conf Proc*. 2016 Aug;56:301–18.
- 471

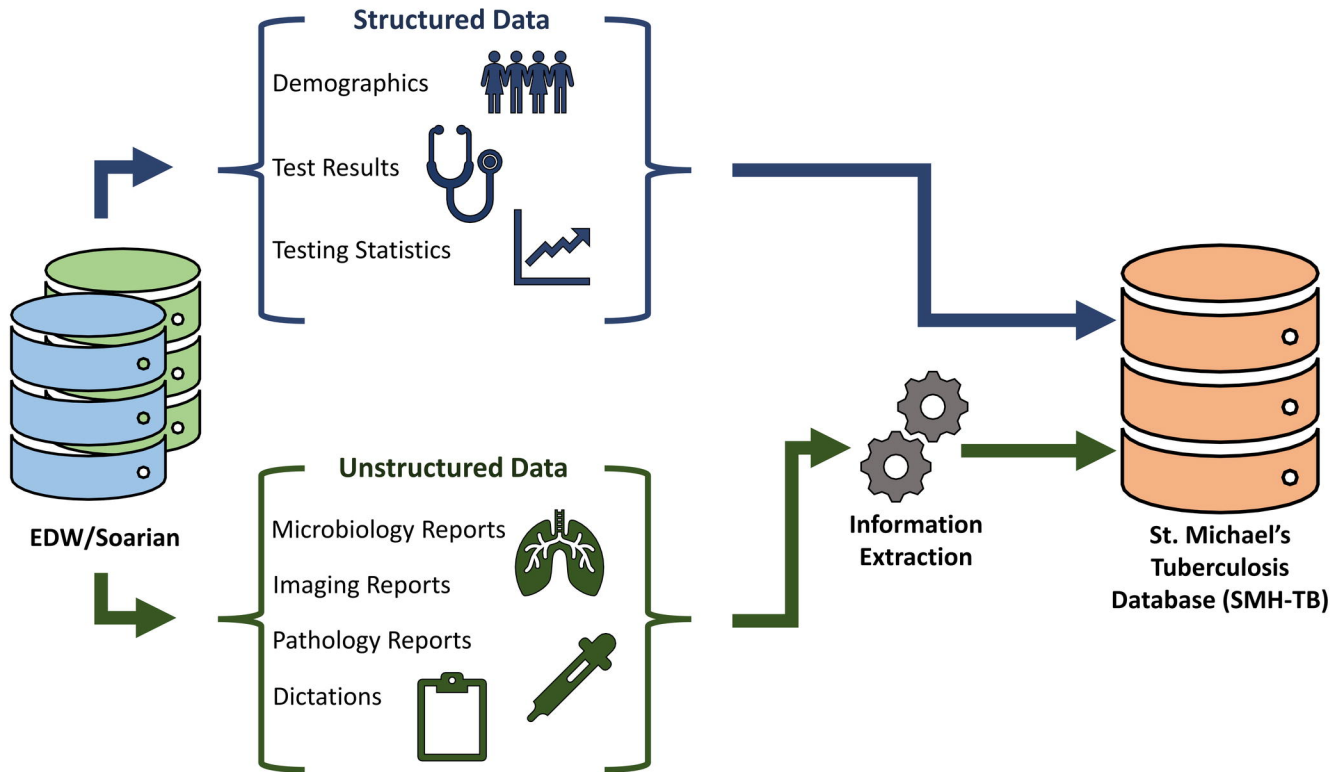



## Patient-Level

### Encounter-Level

Diagnoses

Outpatient Visits

Procedures

Inpatient Visits

Raw Dictations

Emergency Visits

Lab Results

Imaging Results

Extracted Variables

Demographics

TB Diagnosis

TB Medications

Medical Conditions and  
Comorbidities

No Yes +

Delete File Save File

Add Primary Rule

1

If active × appears, then score 0 + ×

and mycobacterium bovis × OR × tuberculosis × OR × \bTB\b × OR × infection × OR × disease × appears after 1, then score 3 ×

unless low (suspicion|chance)? × OR × rul(ing|es|ed|e)? out × OR × denies × OR × asymptomatic × appears, then score ×

unless past × OR × previous × OR × prior × appears, then score ×
